# Supplementary material for: Structure–Activity Relationship Analysis of Rhosin, a RhoA GTPase Inhibitor, Reveals a New Class of Antiplatelet Agents
Source: MDPI journal article supplement (doi:10.3390/ijms24044167), 2023-02-19
Supplement: s1 [file s1]

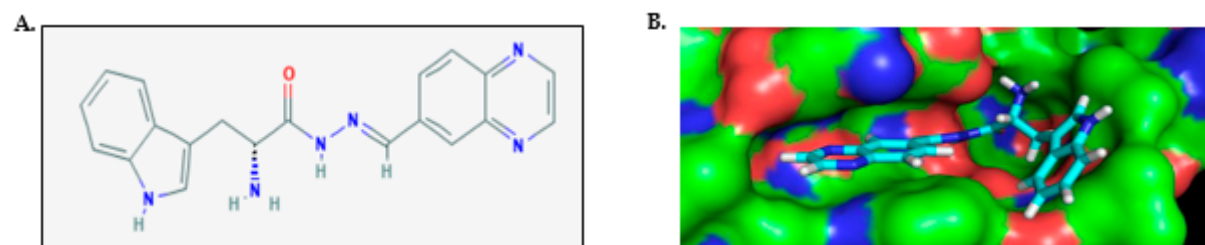

**Figure S1.** Rhosin binds to RhoA at the GEF site. (A) The chemical structure of Rhosin. (B) A simulated docking model of Rhosin on the surface of RhoA.

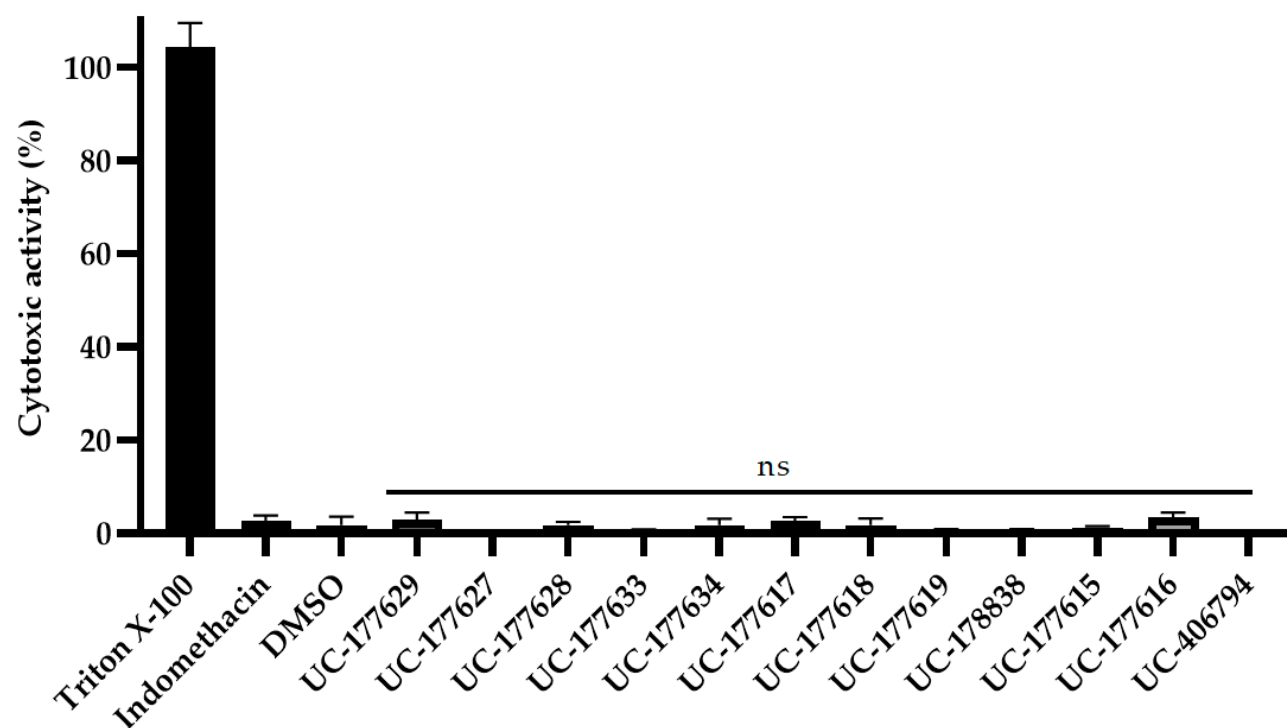

**Figure S2.** Cytotoxic activity of Rhosin-related compounds on washed human platelets determined by Lactate Dehydrogenase (LDH) release. Washed human platelets were incubated with either the Rhosin-related compounds, DMSO or Triton X-100, and the supernatants were used to measure the level of LDH release. The differences between the DMSO and the Rhosin-related compounds were analyzed by t-test, and the results are shown as mean $\pm$ SD from three independent experiments.

## A. UC-177618

Compound\_177618\_2 #2736 RT: 6.47 min; 1 NL: 9.94E+007  
T: FTMS + p ESI d Full ms2 400.0229@hcd25.00 [50.0000-430.0000]

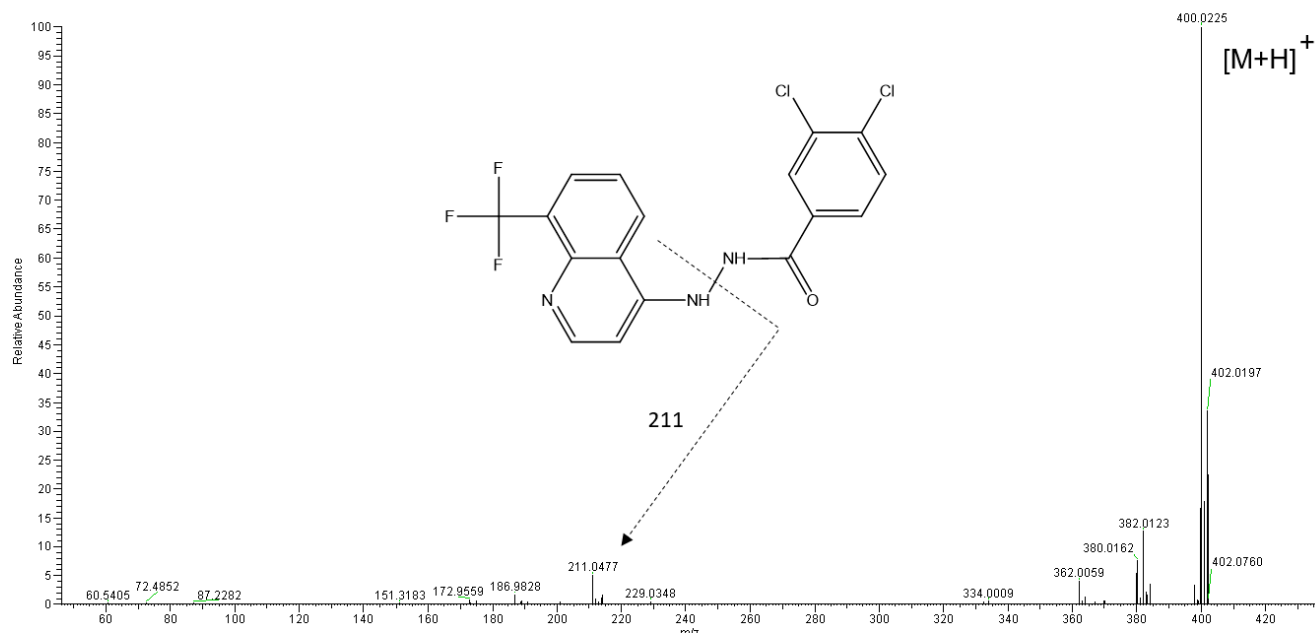

Compound\_177619\_2 #2038 RT: 4.75 min. 1 NL: 7.71E+006  
T. FTMS + p ESI d Full ms2 365.9968@hcd25.00 [50.0000-395.0000]

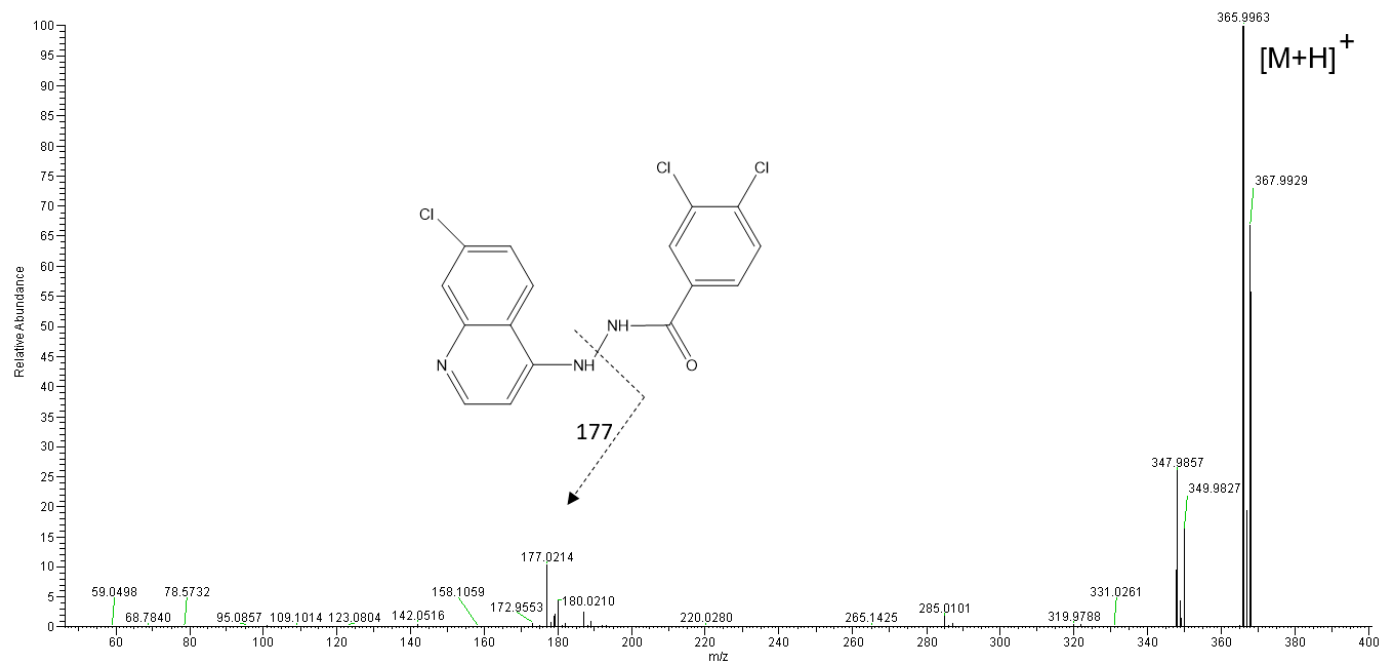

B. UC-177619

Compound\_177628\_2 #1680 RT: 3.81 AV: 1 NL: 2.29E+08  
T: FTMS + p ESI d Full ms2 371.1115@hcd25.00 [50.0000-400.0000]

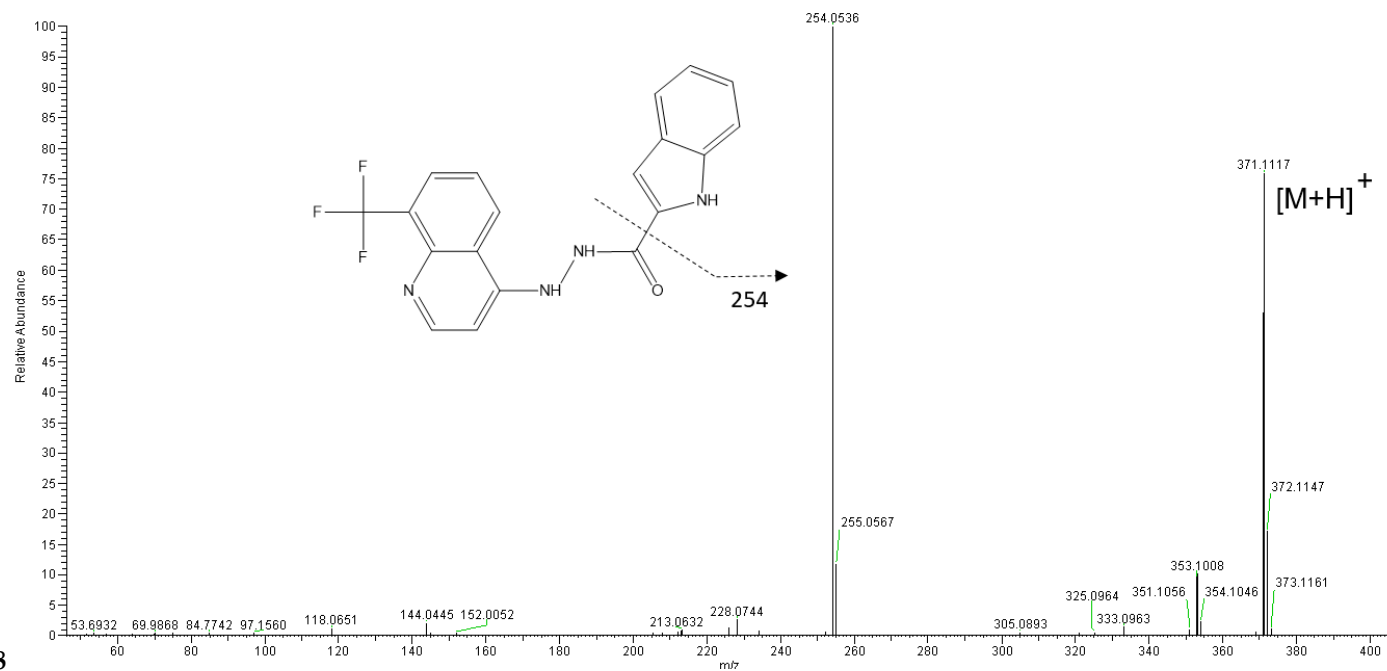

C. UC-177628

Compound\_177629\_2 #1480 RT: 3.30 AV: 1 NL: 7.31E+007  
T: FTMS + p ESId Full ms2 337.0847@hcd25.00 [50.0000-365.0000]

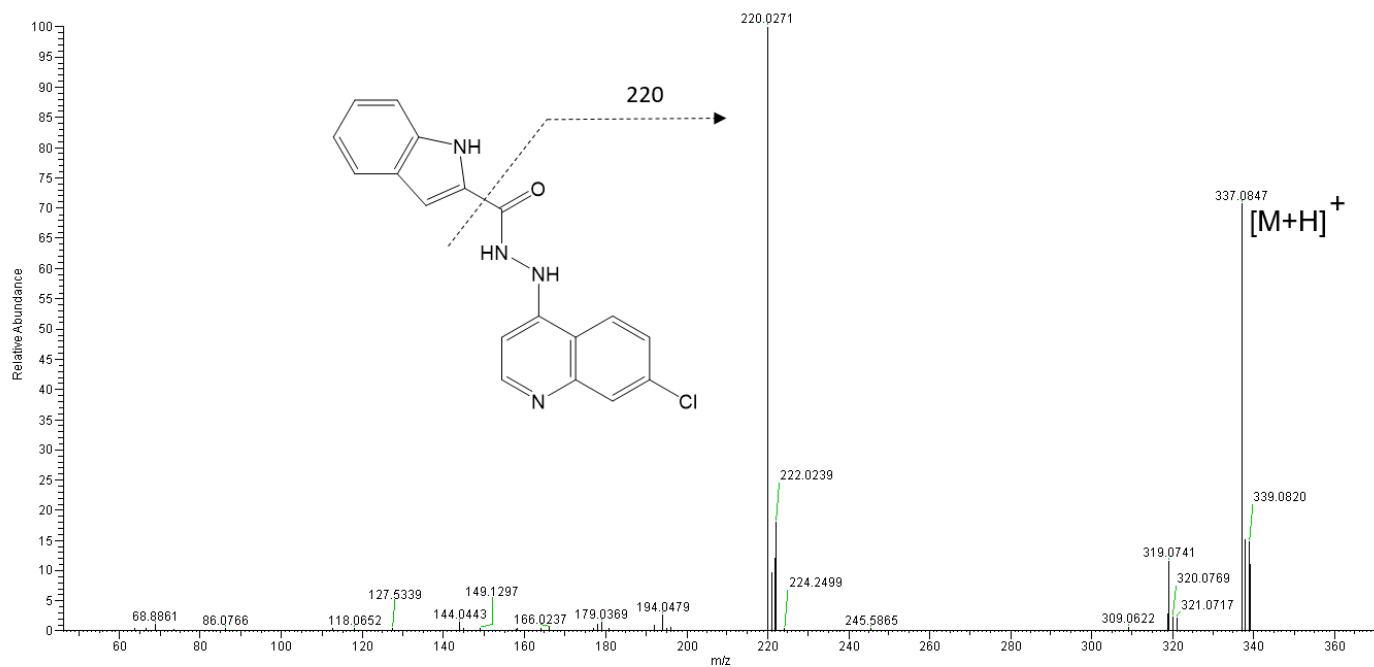

D. UC-177629

Compound\_177633\_2 #1401 RT: 3.12 A/: 1 NL: 8.17E+008  
T: FTMS + p ESId Full ms2 346.2939@hcd25.00 [50.0000-375.0000]

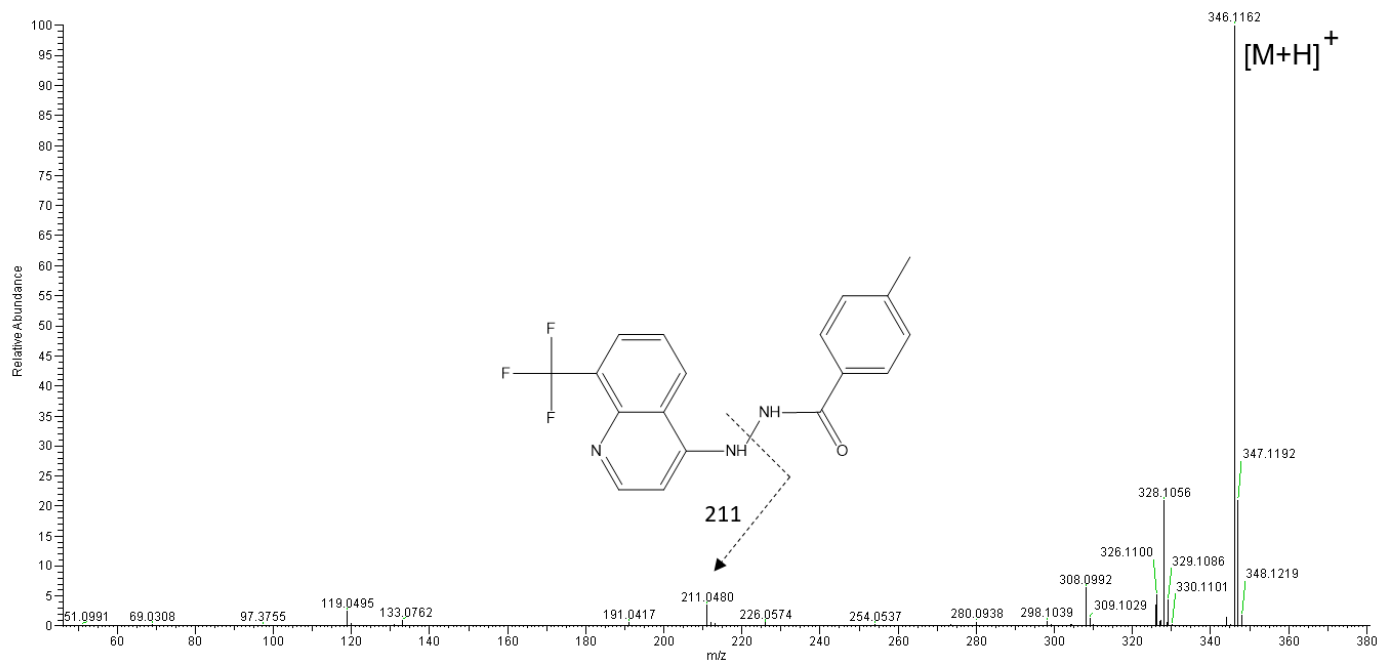

E. UC-177633

Compound\_177634\_2 #1218 RT: 2.69 AV: 1 NL: 6.73E+008  
T: FTMS + p ESI d Full ms2 312.2679@hcd25.00 [50.0000-340.0000]

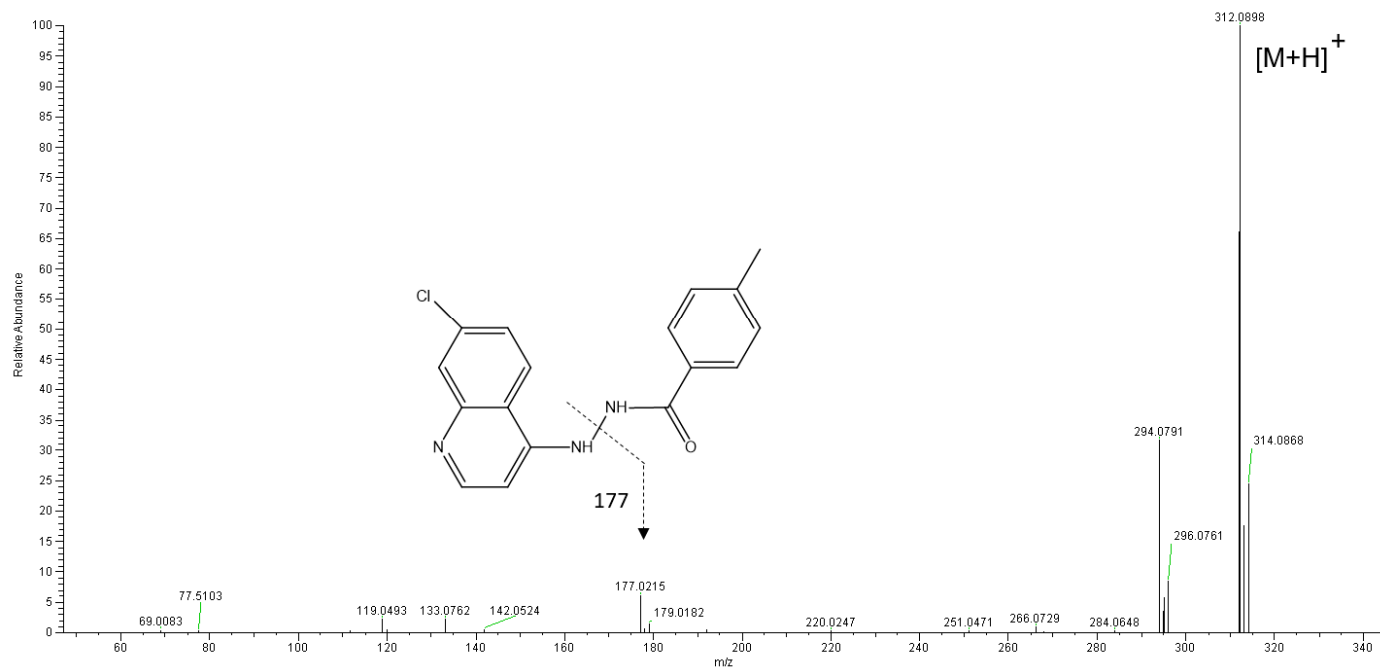

## F. UC-177634

**Figure S3.** Fragmentation pattern peak to confirm the six active analogs. (A-F) UC-177618, UC-177619, UC-177628, UC-177629, UC-177633, and UC-177634 in DMSO solution were dissolved into acetonitrile/water (1/1 v/v). 5  $\mu$ L of the prepared solution was injected into Q Exactive<sup>TM</sup> plus hybrid quadrupole-Orbitrap<sup>TM</sup> mass spectrometer interfaced with Vanquish ultra-high performance liquid chromatography coupled with high-resolution mass spectrometry analysis (UHPLC-HRMS) (M represents the desired compound).

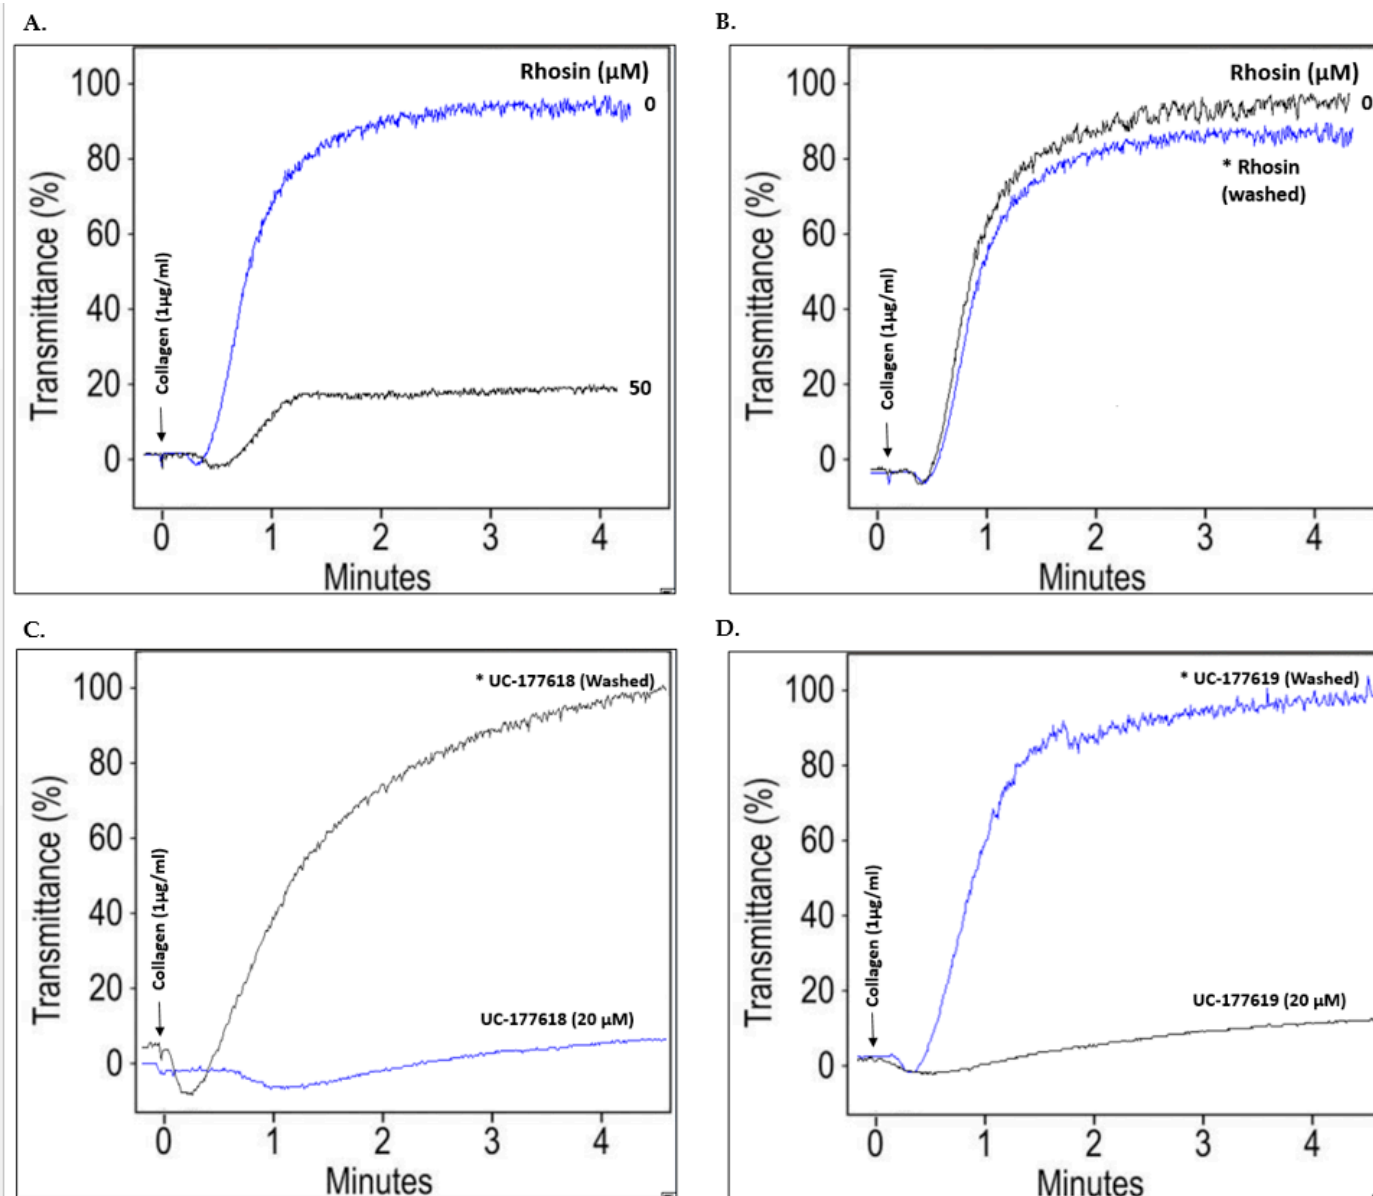

**Figure S4.** Rhosin and its active analogs, UC-177618 and UC-177619 are reversible inhibitors of collagen-induced platelet aggregation. (A) Pre-incubating washed human platelets with R-G04 (50  $\mu\text{M}$ ) for two minutes before stimulating with collagen (1  $\mu\text{g}/\text{ml}$ ) blocked aggregation. (B) However, human platelets incubated with R-G04 (50  $\mu\text{M}$ ) for 30 minutes at 37°C and washed to remove the compound before stimulating with collagen exhibited normal aggregation. (C-D) Pre-incubating washed human platelets with UC-177618 (20  $\mu\text{M}$ ) or UC-177619 (20  $\mu\text{M}$ ) for two minutes before stimulating with collagen (1  $\mu\text{g}/\text{ml}$ ) blocked aggregation. However, human platelets incubated with UC-177618 (20  $\mu\text{M}$ ) or UC-177619 (20  $\mu\text{M}$ ) for



30 minutes at 37°C and washed to remove the compound before stimulating with collagen exhibited normal aggregation. The aggregation tracings are representative of three independent experiments.

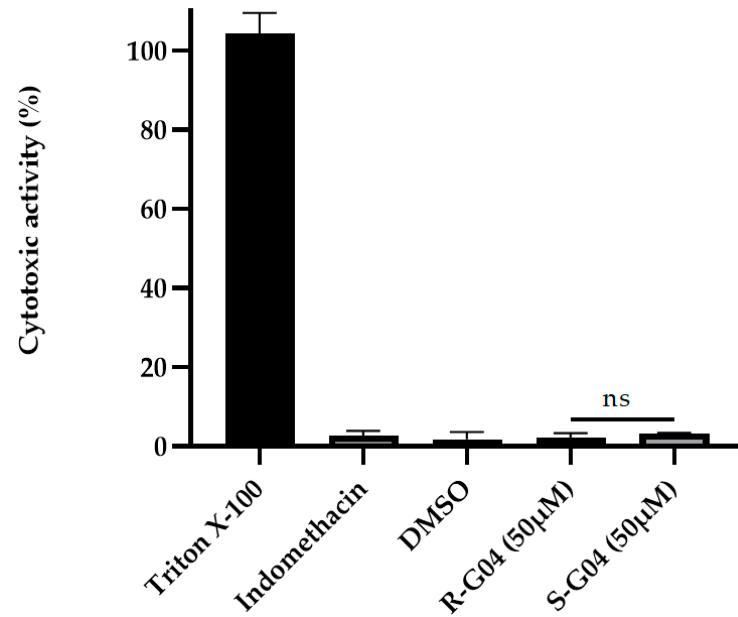

**Figure S5.** Cytotoxic activity of R-G04 and S-G04. Washed human platelets were incubated with R-G04, S-G04, DMSO, or Triton X-100, and the supernatants were used to measure the level of LDH release. The differences between the DMSO, R-G04, and S-G04 were analyzed by t-test, and the results are shown as mean $\pm$ SD from three independent experiments.

GO4R\_2 #854 RT: 1.78 AV: 1 NL: 4.34E+007  
T: FTMS + p ESI d Full ms2 359.1613@hcd25.00 [50.0000-385.0000]

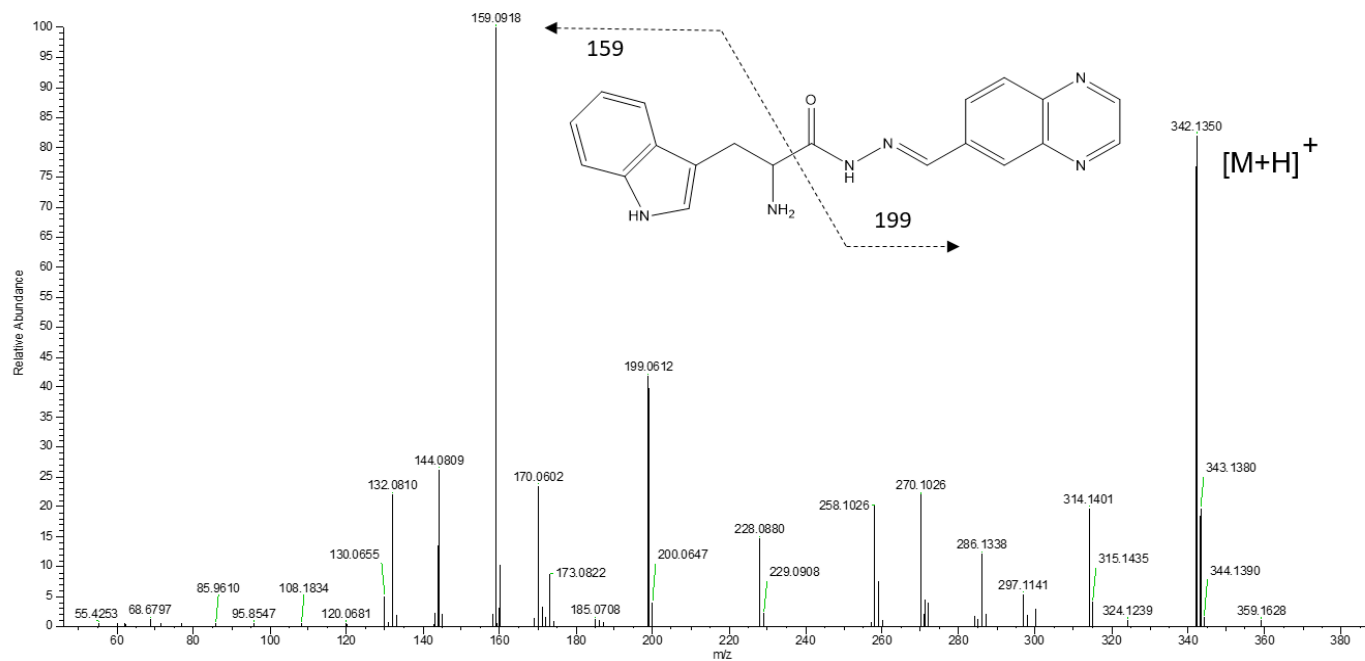

A. R-G04

G04S\_2 #863 RT: 1.80 AV: 1 NL: 4.60E+007  
T: FTMS + p ESI d Full ms2 359.1615@hcd25.00 [50.0000-385.0000]

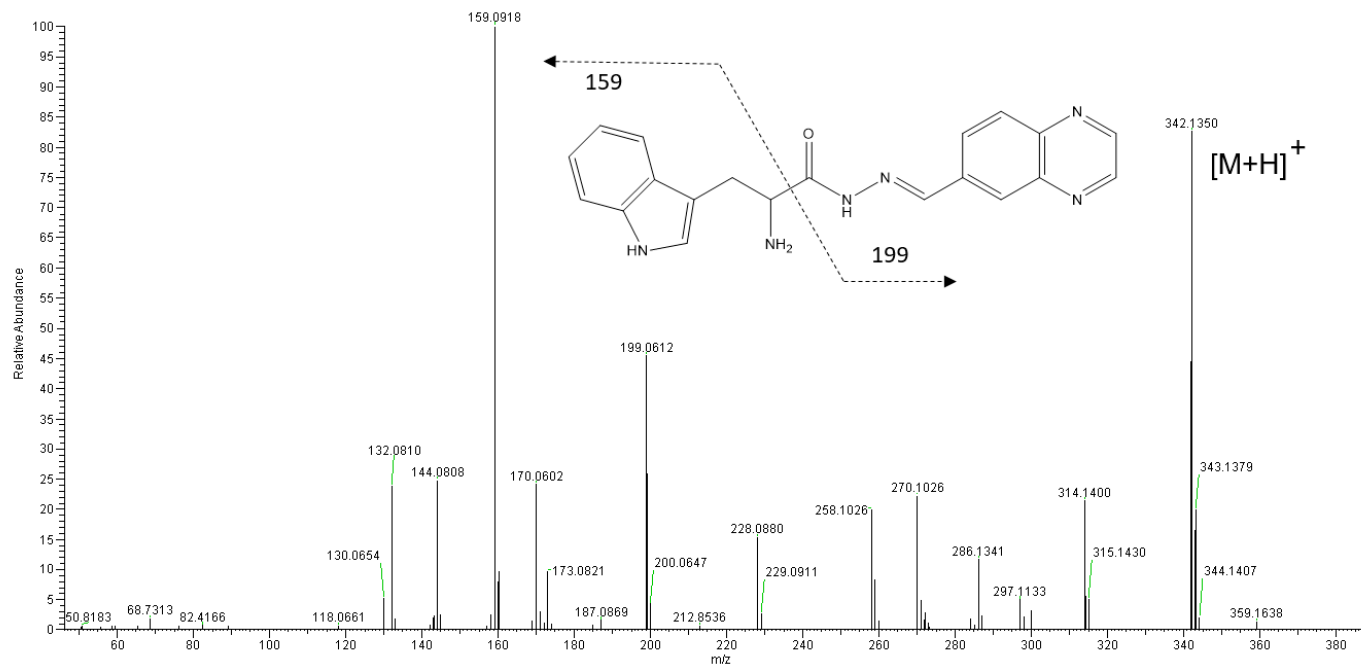

## B. S-G04

**Figure S6.** Fragmentation pattern peak to confirm the 2 enantiomers, R-G04 and S-G04. (A-B) R-G04 and S-G04 in DMSO solution were dissolved into acetonitrile/water (1/1 v/v). 10  $\mu$ L of the prepared solution was injected into Q Exactive<sup>TM</sup> plus hybrid quadrupole-Orbitrap<sup>TM</sup> mass spectrometer interfaced with Vanquish UHPLC-HRMS (M represents the desired compound).
